# Supplementary material
Source: Springer Nature journal article supplement (https://www.springermedizin.de/resource/supplementary/12957_2011_917_MOESM1_ESM.pdf/9565810)
Supplement: MOESM1 [file 9565810]

---

**Epidural anesthesia**

**Extubation immediately post-operatively**

**Direct transfer to Critical Care Unit (CCU)**

**Total Parenteral Nutrition (TPN) started immediately on arrival to CCU**

**Exquisite fluid status monitoring**

---
